# Supplementary material for: Analysis of NKp30/NCR3 isoforms in untreated HIV-1-infected patients from the ANRS SEROCO cohort
Source: PubMed Central journal article supplement — Oncoimmunology. 2013 Mar 1;2(3):e23472. doi: 10.4161/onci.23472 (PMC3661172; doi:10.4161/onci.23472), 2013-03-01
Supplement: onci-2-e23472-s01.pdf [file onci-2-e23472-s01.pdf]

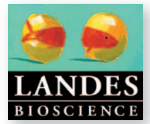

## **Supplemental Material to:**

**Nicole Prada, Guillemette Antoni, Frédéric Commo, Sylvie  
Rusakiewicz, Michaela Semeraro, Faroudy Boufassa,  
Olivier Lambotte, Laurence Meyer, Marie-Lise Gougeon  
and Laurence Zitvogel**

**Analysis of NKp30/NCR3 isoforms in untreated HIV-1-  
infected patients from the ANRS SEROCO cohort**

**Oncoimmunology 2013; 2(3)**

**<http://dx.doi.org/10.4161/onci.23472>**

**[http://www.landesbioscience.com/journals/oncoimmunology/  
article/23472/](http://www.landesbioscience.com/journals/oncoimmunology/article/23472/)**

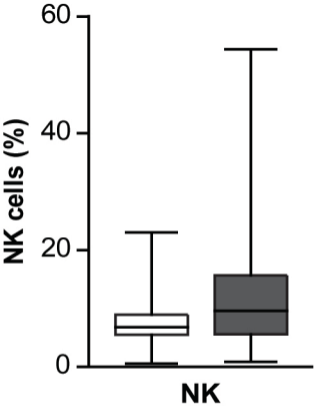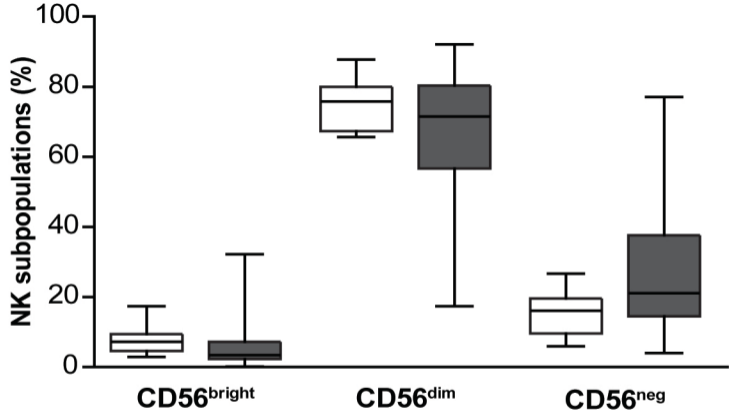

Figure S1

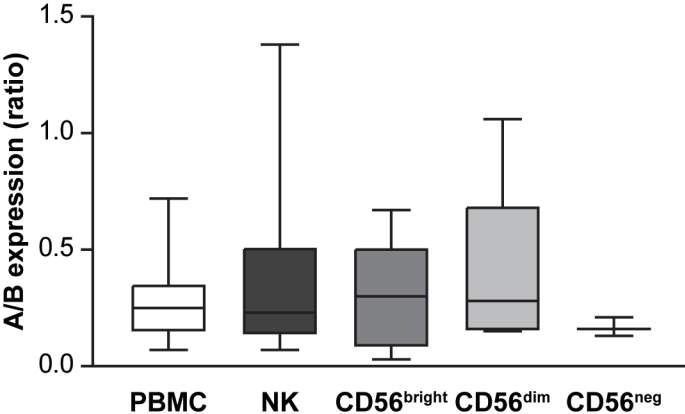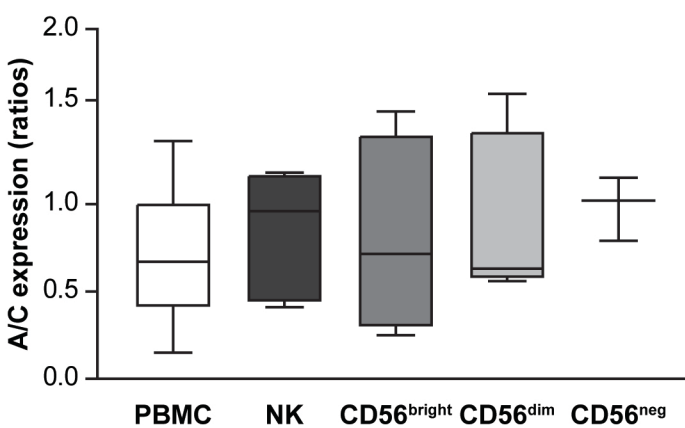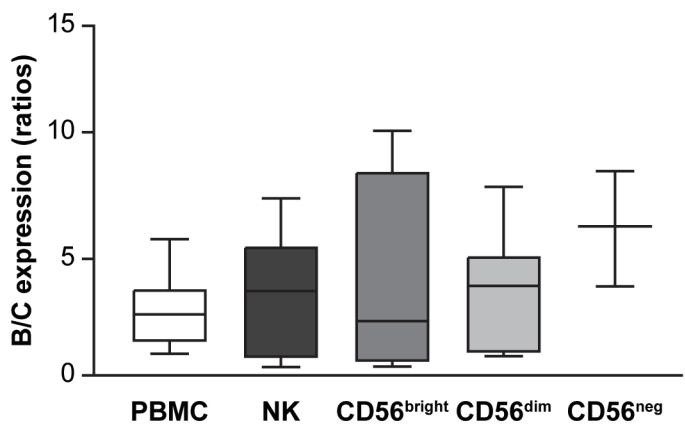

Figure S2

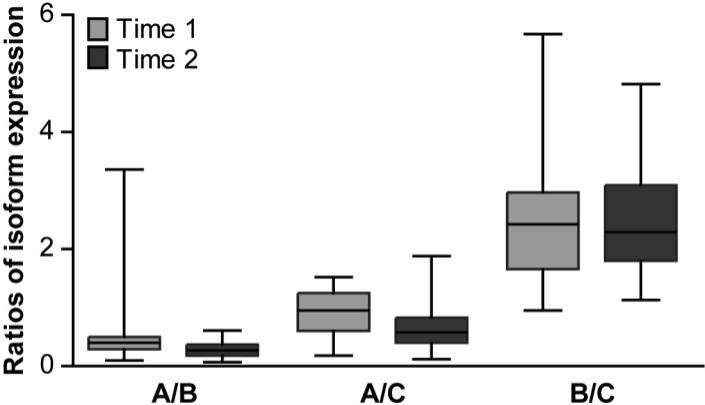

**Figure S3**

Color key

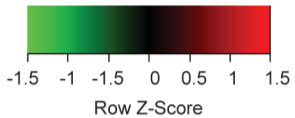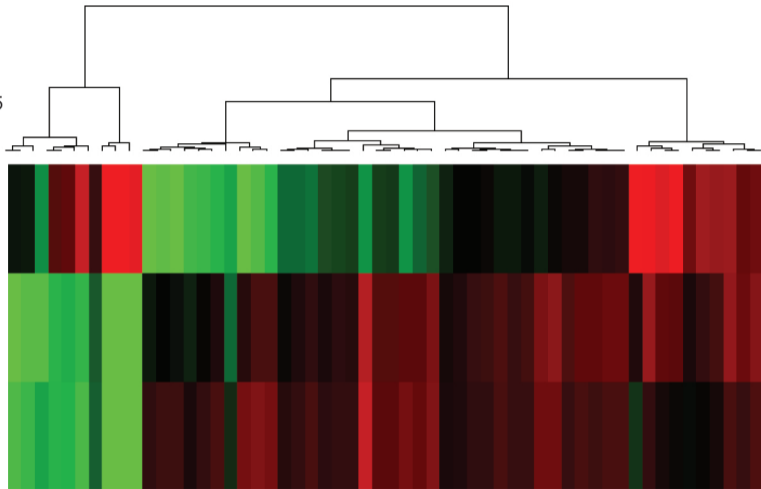

Figure S4

**Figure S1.** Comparable percentages of NK-cells and NK-cell subsets in HIV-1<sup>+</sup> seroconverters and healthy donors. The percentages of natural killer (NK, CD3<sup>+</sup>, CD56<sup>+</sup> and/or CD16<sup>+</sup>) cells among peripheral blood mononuclear cells (PBMCs) and CD56<sup>bright</sup>, CD56<sup>dim</sup> and CD56<sup>neg</sup> cells among NK cells (as defined in **Fig. 1**) are shown. White and grey boxes represent data for healthy donors (HDs, n=10) and HIV-1<sup>+</sup> subjects (n=74), respectively. Middle bars = median values, box plots = 25% and 75% percentiles, whiskers = minimum and maximum values. No statistical difference was found between HIV-1<sup>+</sup> patients and HDs for any of the subsets considered.

**Figure S2.** Consistency of NKp30 isoform profiles in different NK-cell subsets. Relative NKp30 isoform expression levels in peripheral blood mononuclear cells (PBMCs) (n=10), natural killer (NK) cells (n=9), CD56<sup>bright</sup> (n=5), CD56<sup>dim</sup> (n=7) and CD56<sup>neg</sup> (n=3) NK cells from HIV-1<sup>+</sup> patients. Middle bars = median values, box plots = 25% and 75% percentiles, whiskers = minimum and maximum values.

**Figure S3.** Stability over time of NKp30 isoform profile expression. Relative NKp30 isoform expression levels in HIV-1<sup>+</sup> patients (n=10) at two different time points, mean 5.5 years apart. Middle bars = median values, box plots = 25% and 75% percentiles, whiskers = minimum and maximum values.

**Figure S4.** NKp30 isoform profile clustering in healthy donors. Total RNA was isolated from the peripheral blood mononuclear cells (PBMCs) of healthy donors (HDs) and quantified by qRT-PCR. Subjects were then clustered in three groups based on the relative expression levels of the three major NKp30 isoforms (ratio cluster).
